# Supplementary material
Source: PubMed Central journal article supplement (PMC3754876)
Supplement: NIHMS500596-supplement-supplement_1.pdf [file NIHMS500596-supplement-supplement_1.pdf]

## List of Supplementary Material

### Supplementary Materials and Methods

Supplementary Figure 1: Recovery of patients following stem cell transplantation.

Supplementary Figure 2: Diabetes-induced changes in stem cells and their microenvironment.

Supplementary Figure 3: Detection of nestin<sup>+</sup> cells in human bone marrow biopsies.

Supplementary Table 1: Details of the human caseload included in the study.

## References

1. Appelbaum FR: Hematopoietic-cell transplantation at 50. *N Engl J Med* 357: 1472-1475, 2007
2. Thomas ED, Buckner CD, Sanders JE, Papayannopoulou T, Borgna-Pignatti C, De Stefano P, Sullivan KM, Clift RA, Storb R: Marrow transplantation for thalassaemia. *Lancet* 2: 227-229, 1982
3. Rick O, Siegert W, Schwella N, Dubiel M, Krusch A, Beyer J: High-dose chemotherapy as salvage treatment for seminoma. *Bone Marrow Transplant* 30: 157-160, 2002
4. Van Wijmeersch B, Sprangers B, Dubois B, Waer M, Billiau AD: Autologous and allogeneic hematopoietic stem cell transplantation for Multiple Sclerosis: perspective on mechanisms of action. *J Neuroimmunol* 197: 89-98, 2008
5. Lapidot T, Petit I: Current understanding of stem cell mobilization: the roles of chemokines, proteolytic enzymes, adhesion molecules, cytokines, and stromal cells. *Exp Hematol* 30: 973-981, 2002
6. Katayama Y, Battista M, Kao WM, Hidalgo A, Peired AJ, Thomas SA, Frenette PS: Signals from the sympathetic nervous system regulate hematopoietic stem cell egress from bone marrow. *Cell* 124: 407-421, 2006
7. Mendez-Ferrer S, Lucas D, Battista M, Frenette PS: Haematopoietic stem cell release is regulated by circadian oscillations. *Nature* 452: 442-447, 2008
8. Dar A, Kollet O, Lapidot T: Mutual, reciprocal SDF-1/CXCR4 interactions between hematopoietic and bone marrow stromal cells regulate human stem cell migration and development in NOD/SCID chimeric mice. *Exp Hematol* 34: 967-975, 2006
9. Hosing C, Saliba RM, Ahlawat S, Korbling M, Kebriaei P, Alousi A, De Lima M, Okoroji JG, McMannis J, Qazilbash M, Anderlini P, Giralt S, Champlin RE, Khouri I, Popat U: Poor hematopoietic stem cell mobilizers: a single institution study of incidence and risk factors in patients with recurrent or relapsed lymphoma. *Am J Hematol* 84: 335-337, 2009
10. Pusic I, Jiang SY, Landua S, Uy GL, Rettig MP, Cashen AF, Westervelt P, Vij R, Abboud CN, Stockerl-Goldstein KE, Sempek DS, Smith AL, DiPersio JF: Impact of mobilization and remobilization strategies on achieving sufficient stem cell yields for autologous transplantation. *Biol Blood Marrow Transplant* 14: 1045-1056, 2008
11. Like AA, Rossini AA: Streptozotocin-induced pancreatic insulinitis: new model of diabetes mellitus. *Science* 193: 415-417, 1976

### **Human caseload**

Complete data were obtained for 62 total patients. 19 cases of diabetes mellitus were identified (mean  $57\pm 7$  yrs of age; 10 males) following the guidelines of the American Diabetes Association<sup>[50]</sup>. The interval from the documentation of diabetes to transplantation ranged from 6 months to 5.3 years. High levels of blood glucose, HbA1c  $> 7$  gm% (PID 5 HBA1C=6.8, PID17 HBA1C=6.7, PID1,8,9,12 HBA1C missing) and need for insulin treatment were documented. In two cases (11%), diabetes mellitus was associated with the use of corticosteroids, whereas in the remaining cases type I and II diabetes were equally present. Controls consisted of 43 non-diabetic subjects ( $52\pm 12$  yrs; 24 males). The principal needs for autologous peripheral blood stem cell transplantation were clinical remission of multiple myeloma (42%), lymphoma (32%) and acute myeloid leukemia (26%).

### **Stem Cell Mobilization**

CD34<sup>+</sup> cells were counted using a Becton-Dickinson FACSCalibur after erythrocyte lysis (EDTA-ammonium chloride solution) and direct incubation for 30 minutes with phycoerythrin (PE) conjugated monoclonal anti-CD34 (HPCA2, Becton-Dickinson, San Jose, Ca, USA). CD34<sup>+</sup> cell counts were performed following ISHAGE logical gate protocol. A negative control for non specific fluorescence (Simultest; Becton Dickinson, Erembodegem-Aalsi, Belgium) was used with unstained cells; the minimal number of events acquired for each determination was 70,000 and the entire procedure was performed at 4 °C. In all cases only the CD34<sup>+</sup> cell count performed in the

lymphomonocyte gate was considered for data analysis. Chemotherapy included high-dose of cyclophosphamide ( $7 \text{ g/m}^2$ ), ifosfamide, carboplatin, etoposide (ICE)<sup>[51]</sup> or high-dose Ara-C and dexamethasone (DHAP)<sup>[52]</sup> regimens, which were equally employed in the two groups (See supplementary table 1). Starting 24 hrs after the discontinuation of chemotherapy, G-CSF (10 ug/kg/day, Roche, Basel, Switzerland) was subcutaneously given until leukapheresis. From day 9 after priming, circulating CD34<sup>+</sup> cells were monitored daily.

The following parameters were used as criteria for the beginning of leukapheresis: CD34<sup>+</sup> cells  $\geq 20/\text{uL}$  and/or PMNs  $\geq 3000/\text{uL}$ , leukocyte count  $\geq 5,000/\text{uL}$ , platelet count  $\geq 50,000/\text{uL}$ .

### **Human Bone Marrow Biopsies**

Informed consent was obtained from patients according to the National ethical guidelines of the Italian Ministry of Health: DL 116, January 1992. Bone marrow biopsies were performed on the posterior iliac crest using a stainless steel needle, provided with ergonomic handle (ISO 9626 standard) and specimens were fixed in formalin sublimate for 2-4 hr according to the size. After a short decalcification, samples were embedded in paraffin. Sections of 4-5  $\mu\text{m}$  thickness were employed for histochemical and immunohistochemical studies.

Retrospective analysis involved 1,171 bone marrow biopsies performed at the University-Hospital of Parma by the Department of Internal Medicine and Hematology from January 2002 to May 2008 and collected from the database of the Department of Pathology. Non Hodgkin Lymphoma (NHL), Hodgkin Lymphoma (HL), Multiple Myeloma (MM),

Monoclonal Gammopathies of Uncertain Significance (MGUS), Myelodysplastic/Myeloproliferative diseases (MD/MP) including Acute Leukemia (AL), undetermined cytopenias and fever of unknown origin (FUO) were the major indications for bone marrow examination. Clinical records were available on most patients to ensure the presence or absence of diabetes (according the guidelines of the American Diabetes Association) and its time course. Diabetes involved 65 patients in whom 10% (n=7) was type I, 85% (n=55) type II and remaining 5% (n=3) was secondary to corticosteroids treatment.

Normal bone marrow findings, as defined by the absence of neoplastic infiltrates or morphologic or quantitative changes in bone marrow hematopoietic compartments compatible with hematologic disorders, were present in 309 cases and type II diabetes involved 19 (mean age  $57\pm 7$ , 10 males) of these patients. Due to the lack of detailed clinical information or technical artifacts of the specimens, the analysis of control bone marrow samples was restricted to 43 (mean age  $52\pm 12$ , 24 males) non-diabetic cases. On immunostaining we assessed the frequencies and percentage of nestin<sup>+</sup> cells.

In order to reduce non-specific antibody binding, bone marrow sections were exposed to 10-20% serum of the species in which secondary antibodies were developed. Sections were then incubated with isotype-matched controls or specific primary antibodies. Confocal microscopy (Zeiss LSM510 Meta-Axiovert 200) and multiple probes were used to detect by immunofluorescence: 1) nestin (clone P48681, Millipore) expression in individual cells and in vascular profiles including  $\alpha$ -smooth muscle actin ( $\alpha$ -SMA, Sigma) positive arteries. The reactions were visualized by FITC -Ig, TRITC-Ig and Cy5-Ig conjugated secondary antibodies (Jackson Laboratories). Nuclei were stained by DAPI

(4',6-diamidino-2-phenylindole, SIGMA). Quenching of autofluorescence was improved by immersion of sections in an alcoholic solution of Sudan Black.

Tissue sampling involved the entire valuable area included in bone marrow biopsies (range: 20-90 mm<sup>2</sup>) for morphometric parameters and counting a minimum of 120,000 to a maximum of 210,000 cells for the quantification of each investigated antigen. Data were expressed as the incidence of cells per unit area of tissue and by calculating the fraction of cells labelled by the antigen over the total number of counted cells.

### **Stromal co-culture**

Bone marrow stromal cells were obtained expanding the adherent fraction of cells. The expanded cells were then plated at 2200 cells/well in 384-well tissue culture plates (Millipore; FC010) in  $\alpha$ MEM plus 10%FCS. After four days of culture, 250 LSK 48<sup>+</sup> cells from 8-12 week old actin-DsRed positive mice (Jackson Laboratory; 005441) were plated in each well. After 5 days of co-culture the number of Ds-Red<sup>+</sup> cells was assessed using a fluorescent microscope (Leica) and the number of fluorescent red cells was counted using Image J software.

**Supplementary table 1:** Details of the human caseload included in the study. Columns represent (from left to right): age; sex; glucose levels at the time of admission; years from the onset of the diabetes; HBA1C: glycate hemoglobin levels (%); hematologic disease; No preTx: number of chemotherapy cycles administered to the patient before the mobilization; type of mobilization regimen; amount of CD34<sup>+</sup> cells collected; amount of mononuclear cells harvested from the BM (data applicable just for the poor mobilizers); daily dose of insulin in diabetic subjects.

| Patient      | Age | Sex | Glucose (mg/dL) | Years of diabetes | HBA1C | Disease | No preTx | Mobilization regimen | CD34 <sup>+</sup> (x10 <sup>6</sup> /kg) | BM (x10 <sup>6</sup> /kg) | Insulin (U/day) |
|--------------|-----|-----|-----------------|-------------------|-------|---------|----------|----------------------|------------------------------------------|---------------------------|-----------------|
| Diabetic     | 67  | M   | 100             | 0.5               |       | MM      | 2        | ICE                  | 7.29                                     |                           | 20              |
|              | 67  | F   | 120             | 2                 | 8     | MM      | 2        | ICE                  | 12                                       |                           | 28              |
|              | 57  | F   | 185             | 1.4               | 9.1   | MM      | 2        | Cyclophosphamide     | 4.4                                      |                           | 14              |
|              | 63  | M   | 137             | 2.2               | 8.9   | MM      | 2        | Cyclophosphamide     | 16.7                                     |                           | 8               |
|              | 43  | M   | 177             | 0.8               | 6.8   | MM      | 2        | Cyclophosphamide     | 7.5                                      |                           | 24              |
|              | 58  | M   | 200             | 3.4               | 8.3   | MM      | 2        | Cyclophosphamide     | 3.53                                     |                           | 30              |
|              | 61  | M   | 111             | 2.8               | 8.5   | L       | 4        | RDHAP                | 3                                        |                           | 20              |
|              | 49  | M   | 258             | 0.9               |       | MM      | 2        | ICE                  | 4.1                                      |                           | 16              |
|              | 56  | F   | 290             | 0.7               |       | L       | 4        | RDHAP                | 4.75                                     |                           | 22              |
|              | 55  | F   | 213             | 5.2               | 8.4   | MM      | 2        | Cyclophosphamide     | 5.05                                     |                           | 18              |
|              | 39  | F   | 165             | 3.2               | 7.9   | MM      | 2        | Cyclophosphamide     | 10                                       |                           | 14              |
|              | 62  | F   | 201             | 5.1               |       | MM      | 1        | Cyclophosphamide     | 8.7                                      |                           | 12              |
|              | 56  | F   | 110             | 4                 | 7.6   | AL      | 2        | FLAG                 | FAILURE                                  | 180                       | 24              |
|              | 55  | M   | 230             | 2.4               | 8.1   | AL      | 2        | DNR-ARAC             | FAILURE                                  | 214                       | 28              |
|              | 58  | M   | 140             | 3.3               | 8.4   | MM      | 2        | Cyclophosphamide     | FAILURE                                  | 112.5                     | 22              |
|              | 54  | F   | 134             | 3.9               | 7.7   | AL      | 2        | DNR-ARAC             | FAILURE                                  | 160                       | 18              |
|              | 61  | M   | 245             | 0.6               | 6.7   | AL      | 3        | DNR-ARAC             | FAILURE                                  | 257.2                     | 12              |
|              | 62  | F   | 303             | 5.3               | 8.2   | AL      | 2        | DNR-ARAC             | FAILURE                                  | 150                       | 24              |
| 59           | M   | 98  | 4.8             | 9.1               | AL    | 3       | DNR-ARAC | FAILURE              | 211                                      | 20                        |                 |
| Non diabetic | 28  | M   | 80              |                   |       | AL      | 2        | DNR-ARAC             | 28.3                                     |                           |                 |
|              | 51  | F   | 84              |                   |       | MM      | 2        | Cyclophosphamide     | 8.5                                      |                           |                 |
|              | 60  | F   | 76              |                   |       | MM      | 2        | Cyclophosphamide     | 15.6                                     |                           |                 |
|              | 69  | M   | 90              |                   |       | AL      | 2        | DNR-ARAC             | 3.3                                      |                           |                 |
|              | 64  | M   | 80              |                   |       | MM      | 2        | Cyclophosphamide     | 12.1                                     |                           |                 |
|              | 69  | F   | 92              |                   |       | L       | 4        | DNR-ARAC             | 10                                       |                           |                 |

| Patient      | AGE | SEX | Glucose (mg/dL) | Years of diabetes | HBA1C | Disease | No of preTx | Mobilization regimen | CD34 <sup>+</sup> (x10 <sup>6</sup> /kg) | BM (x10 <sup>6</sup> /kg) | Insulin (U/day) |
|--------------|-----|-----|-----------------|-------------------|-------|---------|-------------|----------------------|------------------------------------------|---------------------------|-----------------|
| Non diabetic | 55  | F   | 91              |                   |       | MM      | 2           | IEV                  | 19.1                                     |                           |                 |
|              | 60  | F   | 100             |                   |       | AL      | 3           | DNR-ARAC             | 5                                        |                           |                 |
|              | 70  | F   | 99              |                   |       | MM      | 2           | Cyclophosphamide     | 10.8                                     |                           |                 |
|              | 46  | M   | 68              |                   |       | AL      | 3           | DNR-ARAC             | 7.8                                      |                           |                 |
|              | 69  | M   | 79              |                   |       | MM      | 3           | Cyclophosphamide     | 12.5                                     |                           |                 |
|              | 32  | M   | 145             |                   |       | L       | 6           | Cyclophosphamide     | 18.7                                     |                           |                 |
|              | 60  | F   | 88              |                   |       | L       | 4           | Cyclophosphamide     | 4.8                                      |                           |                 |
|              | 40  | M   | 83              |                   |       | AL      | 3           | DNR-ARAC             | 20                                       |                           |                 |
|              | 62  | F   | 84              |                   |       | MM      | 2           | Cyclophosphamide     | 12                                       |                           |                 |
|              | 58  | M   | 84              |                   |       | L       | 4           | R-DHAP-R             | 7.3                                      |                           |                 |
|              | 48  | F   | 80              |                   |       | MM      | 1           | Cyclophosphamide     | 26.3                                     |                           |                 |
|              | 51  | M   | 95              |                   |       | L       | 6           | Cyclophosphamide     | 8.2                                      |                           |                 |
|              | 52  | M   | 92              |                   |       | MM      | 2           | cyclophosphamide     | 16.1                                     |                           |                 |
|              | 39  | F   | 97              |                   |       | L       | 4           | ICE                  | 4.4                                      |                           |                 |
|              | 42  | F   | 72              |                   |       | L       | 4           | IV                   | 3.4                                      |                           |                 |
|              | 51  | M   | 81              |                   |       | L       | 4           | R-DHAP-R             | 11.6                                     |                           |                 |
|              | 29  | F   | 74              |                   |       | L       | 4           | Cyclophosphamide     | 6                                        |                           |                 |
|              | 35  | M   | 89              |                   |       | MM      | 2           | Cyclophosphamide     | 7.4                                      |                           |                 |
|              | 50  | M   | 94              |                   |       | MM      | 2           | Cyclophosphamide     | 10                                       |                           |                 |
|              | 41  | F   | 110             |                   |       | L       | 4           | DNR-ARAC             | 11.17                                    |                           |                 |
|              | 67  | M   | 69              |                   |       | L       | 4           | DNR-ARAC             | 17.8                                     |                           |                 |
|              | 43  | F   | 113             |                   |       | L       | 4           | Cyclophosphamide+R   | 35.7                                     |                           |                 |
|              | 49  | F   | 80              |                   |       | L       | 4           | R-DHAP-R             | 26.5                                     |                           |                 |
|              | 48  | F   | 79              |                   |       | L       | 4           | ICE                  | 11.6                                     |                           |                 |
|              | 46  | F   | 82              |                   |       | AL      | 3           | DNR-ARAC             | 21                                       |                           |                 |
|              | 54  | M   | 80              |                   |       | L       | 4           | DHAP                 | 40                                       |                           |                 |
|              | 45  | M   | 77              |                   |       | MM      | 2           | Cyclophosphamide     | 6.3                                      |                           |                 |
|              | 34  | M   | 93              |                   |       | AL      | 3           | Cyclophosphamide     | 4.5                                      |                           |                 |
|              | 55  | M   | 90              |                   |       | MM      | 3           | Cyclophosphamide     | 5.6                                      |                           |                 |
|              | 57  | M   | 109             |                   |       | MM      | 2           | Cyclophosphamide     | 8.9                                      |                           |                 |
| 57           | F   | 98  |                 |                   | AL    | 3       | DNR-ARAC    | FAILURE              |                                          | 277                       |                 |
| 58           | F   | 102 |                 |                   | L     | 4       | DHAP        | FAILURE              |                                          | 200                       |                 |

| Patient      | AGE | SEX | Glucose (mg/dL) | Years of diabetes | HBA1C | Disease | No of preTx | Mobilisation regimen | CD34 <sup>+</sup> (x10 <sup>6</sup> /kg) | BM (x10 <sup>6</sup> /kg) | Insulin (U/day) |
|--------------|-----|-----|-----------------|-------------------|-------|---------|-------------|----------------------|------------------------------------------|---------------------------|-----------------|
| Non diabetic | 48  | M   | 142             |                   |       | L       | 4           | RDHAP                | FAILURE                                  | 193                       |                 |
|              | 50  | M   | 99              |                   |       | AL      | 3           | DNR-ARAC             | FAILURE                                  | 154                       |                 |
|              | 43  | M   | 105             |                   |       | L       | 4           | RDHAP                | FAILURE                                  | 139                       |                 |
|              | 71  | M   | 110             |                   |       | AL      | 3           | DNR-ARAC             | FAILURE                                  | 238                       |                 |
|              | 69  | M   | 132             |                   |       | MM      | 2           | Cyclophosphamide     | FAILURE                                  | 190                       |                 |

Abbreviations: M: male; F: female; MM: multiple myeloma; L: lymphoma; AL: acute leukemia; ICE: Ifosfamide, Carboplatin, Etoposide; R-DHAP: Rituximab, Dexamethazone, Cytarabine, Cisplatin; DNR-ARAC: Daunorubicin, standard doses- Cytarabine high doses; IEV: Ifosfamide, Epirubicin, Etoposide; R-DHAP-R: Rituximab-Dexamethazone, Cytarabine, Cisplatin-Rituximab; DHAP: Dexamethazone, Cytarabine, Cisplatin, standard doses; IV: Ifosfamide, Etoposide; BUCY: Busulphan, Cyclophosphamide; FLAG: G-CSF, Fludarabine, Cytarabine.

The following drugs were equally used by both groups of patients: Angiotensin Converting Enzyme Inhibitors, beta-Blockers, alpha blockers, Calcium antagonist, Clonidine, Thiazide, Thyroxine, Gabapentin, Sartans, Statins, Aspirin, Valproic acid Paroxetine, Sertraline, Serotonine reuptake inhibitors, Tiamazol

In not diabetic patients: Insulin doses were only occasionally required.

In diabetic patients: Oral hypoglycemic drugs were used by 30% of patients and daily Insulin doses (25-40 U) were employed in all cases.



**Supplementary Fig. 1**

**PB-SCT**

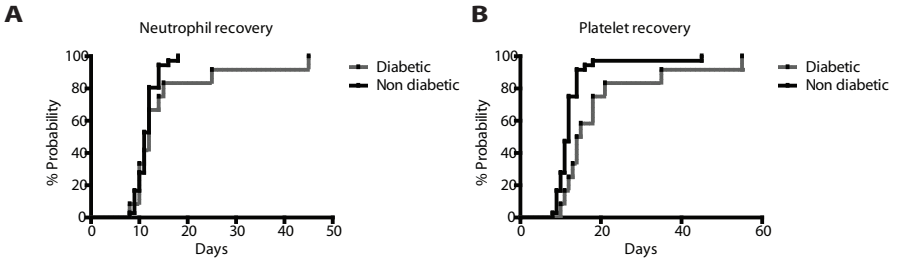

**BM-SCT**

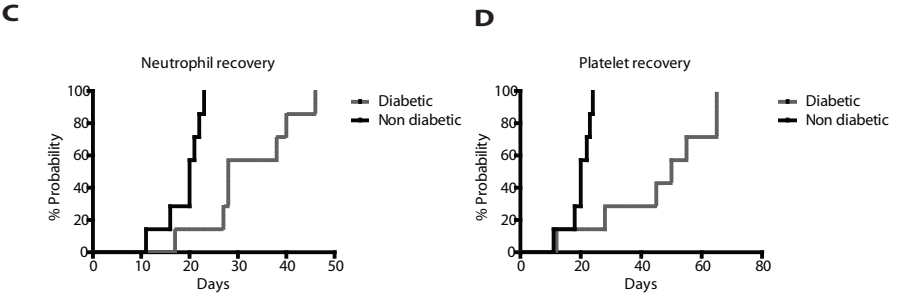

**E**

|                     | Non-diabetic | Diabetic     | p     |
|---------------------|--------------|--------------|-------|
| <b>PB-SCT</b>       |              |              |       |
| PMNs recovery       |              |              |       |
| Median days (range) | 11 (8-18)    | 12 (8-45)    | 0.146 |
| PLTs recovery       |              |              |       |
| Median days (range) | 12 (8-45)    | 14.5 (10-55) | 0.006 |
| <b>BM-SCT</b>       |              |              |       |
| PMNs recovery       |              |              |       |
| Median days (range) | 20 (11-23)   | 28 (17-46)   | 0.002 |
| PLTs recovery       |              |              |       |
| Median days (range) | 20 (11-24)   | 50 (12-65)   | 0.003 |

**Supplementary figure 1:**

Curves representing probability of (A) neutrophil and (B) platelet engraftment in patients receiving mobilized CD34<sup>+</sup> autologous cells. Diabetic patients exhibit trend towards longer neutrophil recovery (n=12, p= 0.146) and longer time to platelet engraftment (p=0.006). Curves representing probability of (C) neutrophil and (D) platelet engraftment in patients receiving BM harvested autologous cells. Diabetes is associated with slower engraftment of both neutrophil and platelet (n=7, p=0.002 and p=0.003 respectively) (E) Table showing median days (range) of platelets and neutrophil recovery in both groups of patients.

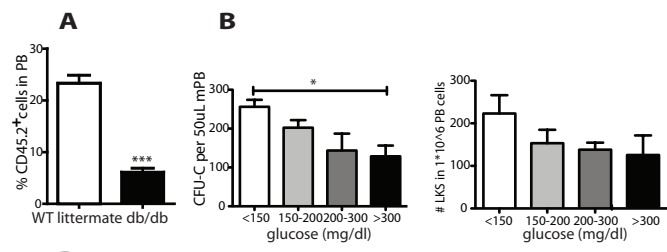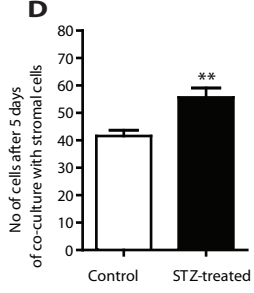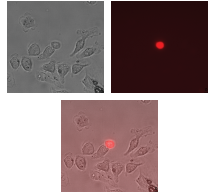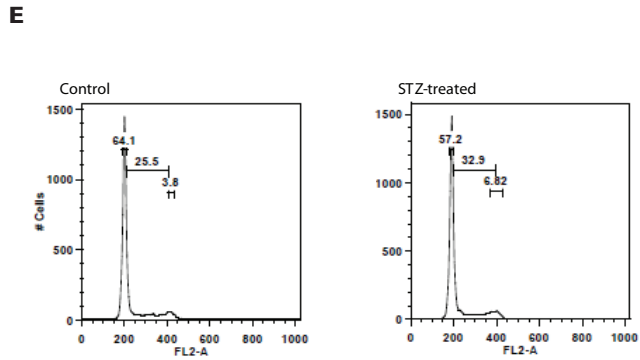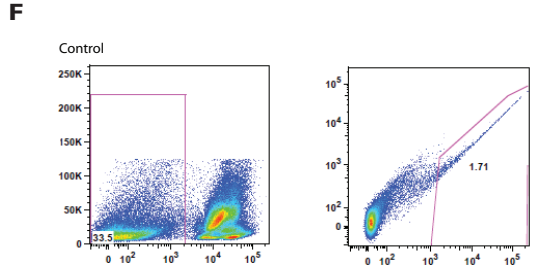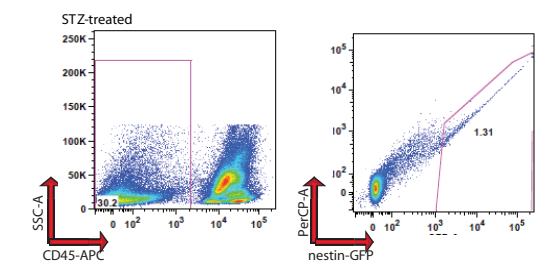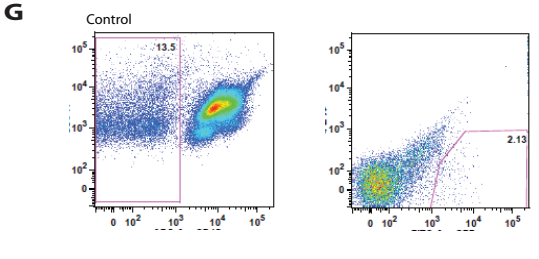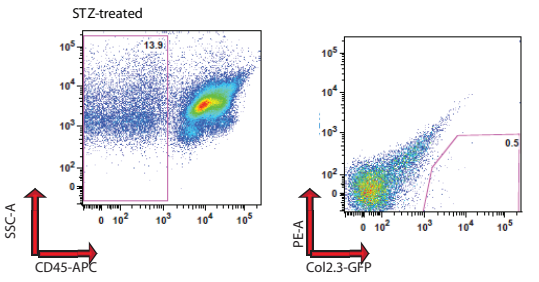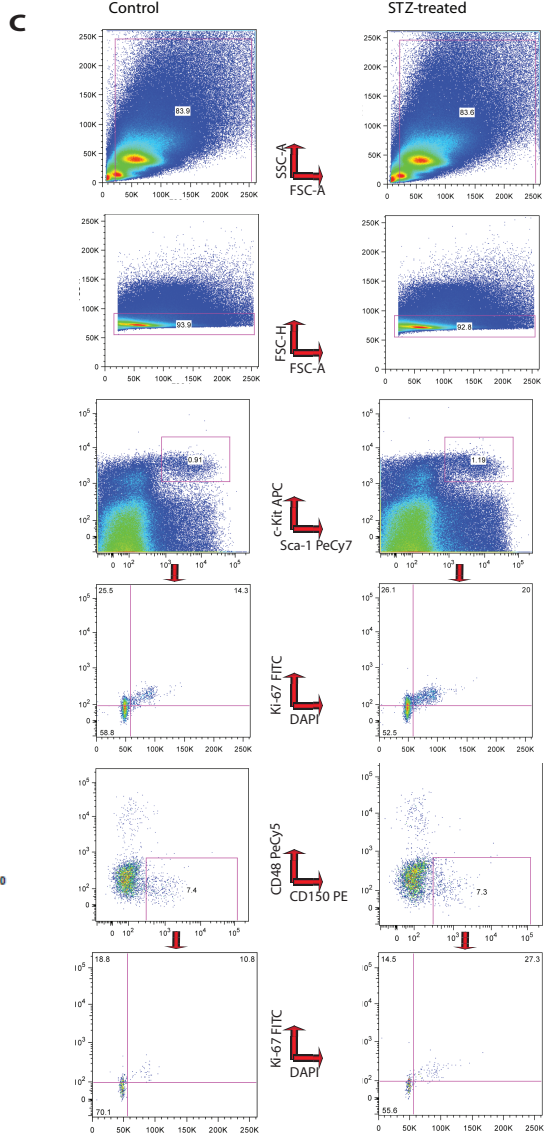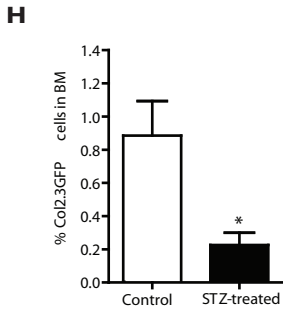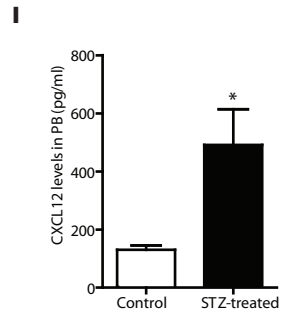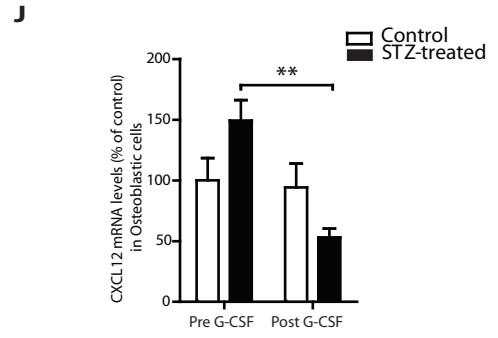

### Supplementary figure 2:

(A) Percentages of total CD45.2<sup>+</sup> donor derived cells in the peripheral blood of lethally irradiated SJL recipients transplanted with 150 ul G-CSF mobilized PB from db/db or wild type littermates as assessed by FACS analysis four weeks post-transplantation. Columns represent mean  $\pm$  s.e.m., n=11 control and n=12 db/db, \*\*\*p<0.001. (B) Bars are mean number  $\pm$  s.e.m of CFU-C (left graph) and LSK (right panel) of *db/db* mice grouped in four categories based upon glycemic levels (<150, 150-200, 200-300, >300 mg/dl), \* p<0.05. (C) Representative FACS plots of gating strategies used in cell cycle analysis of LSK and LT-HSC. (D) Columns are mean  $\pm$  s.e.m. of Lin<sup>-</sup>Sca<sup>+</sup>cKit<sup>+</sup>CD48<sup>-</sup> after 5 days co-culture onto control or STZ-treated BM-originating stroma cells. Representative photos showing a DsRed<sup>+</sup> (top left panel, red dot) Lin<sup>-</sup>Sca<sup>+</sup>cKit<sup>+</sup>CD48<sup>-</sup> cell on top of stromal cells (top right panel, bright field). Bottom panel: merged fluorescent and bright field. (E) Representative FACS plots of propidium iodide staining in whole BM control and STZ-treated mice to determine cell cycle status. STZ-treated mice exhibit lower fractions of cells in G0-G1 phase compared to control mice (n=5, \*p<0.05). (F) FACS plots showing percentages of nestinGFP<sup>+</sup> cells in collagenase treated bones from STZ-treated and control mice. No difference in the percentages between the two groups was found. (G) FACS plots showing the difference in col2.3GFP cells percentages in diabetic and control mice. (H) Histograms showing statistical significant decrease in the percentages of col2.3 GFP cells in diabetic mice (\*p<0.05, n=6). (I) Quantification of CXCL12 levels in PB of STZ-treated versus control mice. Diabetic mice have higher CXCL12 circulating levels (\*p<0.05, n=6). (J) Percentage difference

in *Cxcl12* mRNA levels in osteoblastic cells under steady state condition and after G-CSF administration. White bars are controls and black bars represent STZ-treated mice, n=6, \*\*p<0.01.

### Supplementary Fig. 3

**A**

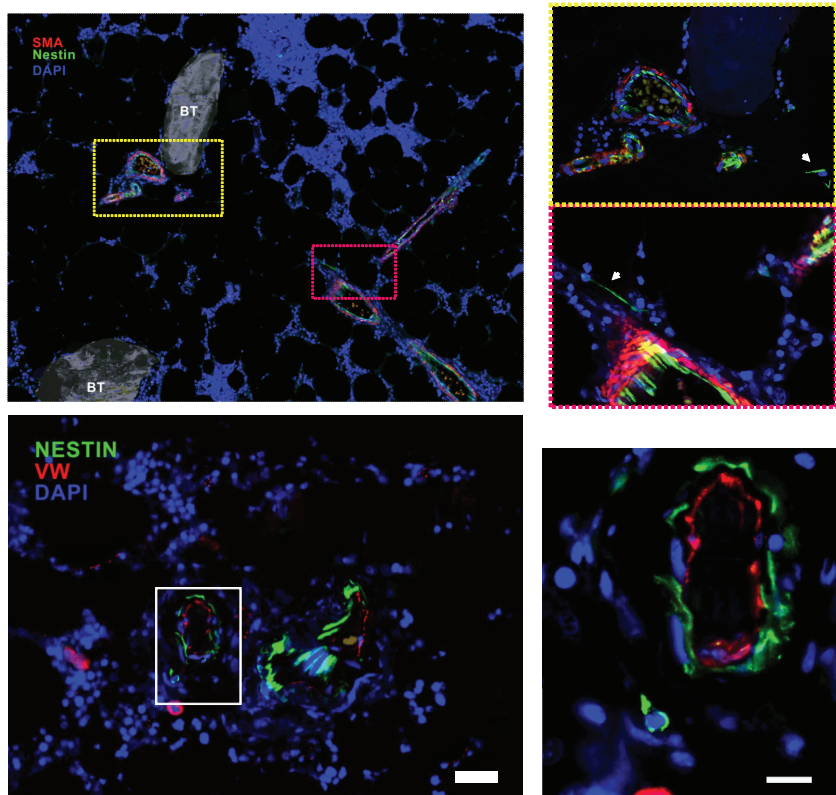

**B**

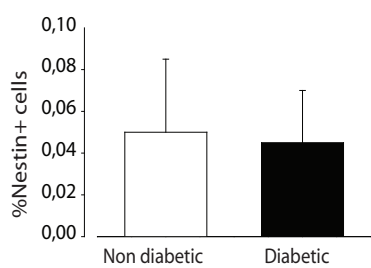

**C**

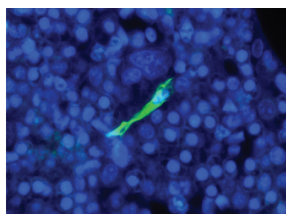

**D**

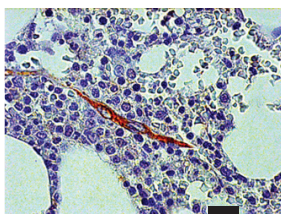

### **Supplementary figure 3:**

The number of nestin cells was analysed in disease free bone marrow biopsies from 19 diabetic patients and 32 non diabetic individuals (see methods). **(A)** Immunohistochemical detection of nestin in human bone marrow. Upper panel: low power confocal image of nestin (green fluorescence) labelling on the subendothelial layer of  $\alpha$ -smooth muscle actin positive ( $\alpha$ -SMA, red fluorescence) arterioles. Phase contrast images of bone trabeculae (BT) were superimposed. Adjacent yellow and red rectangles include microscopic fields shown at higher magnification. Lower panels: irregularly shaped nestin<sup>+</sup>  $\alpha$ -SMA<sup>-</sup> cells are shown in proximity of arterial profiles. Blue fluorescence corresponds to DAPI staining of nuclei. **(B)** Bar graphs of the percentages of nestin<sup>+</sup> cells in BM of control and diabetic patients. P=NS. Two examples of individual nestin<sup>+</sup> cells with an elongated shape are shown by **(C)** immunofluorescence (green) and **(D)** immunoperoxidase (brownish). Scale bars = 10  $\mu$ m.
